# Supplementary material for: Substantial Contribution of SmeDEF, SmeVWX, SmQnr, and Heat Shock Response to Fluoroquinolone Resistance in Clinical Isolates of Stenotrophomonas maltophilia
Source: PubMed Central journal article supplement (PMC6479208; doi:10.3389/fmicb.2019.00822), 2019-04-17
Supplement: Table_1.pdf [file Table_1.pdf]

**Table S1 Bacterial strains and plasmids used in this study**

| Strain or plasmid              | Genotype or properties                                                                                                                                                                                  | Reference         |
|--------------------------------|---------------------------------------------------------------------------------------------------------------------------------------------------------------------------------------------------------|-------------------|
| <b><i>S. maltophilia</i></b>   |                                                                                                                                                                                                         |                   |
| KJ                             | A clinical quinolone-susceptible isolate                                                                                                                                                                | Hu et al. 2008    |
| KJ $\Delta$ DEF                | <i>S. maltophilia</i> KJ mutant of <i>smeDEF</i> operon; $\Delta$ <i>smeDEF</i>                                                                                                                         | Huang et al. 2017 |
| KJ $\Delta$ 5                  | <i>S. maltophilia</i> KJ mutant of <i>smeUIVWU2X</i> operon; $\Delta$ <i>smeUIVWU2X</i>                                                                                                                 | Chen et al. 2011  |
| KJ $\Delta$ Qnr                | <i>S. maltophilia</i> KJ mutant of <i>Smqnr</i> ; $\Delta$ <i>Smqnr</i>                                                                                                                                 | Chang et al. 2011 |
| KJ $\Delta$ RpoE               | <i>S. maltophilia</i> KJ mutant of <i>rpoE</i> ; $\Delta$ <i>rpoE</i>                                                                                                                                   | Huang et al. 2014 |
| KJ $\Delta$ RseA               | <i>S. maltophilia</i> KJ mutant of <i>rseA</i> ; $\Delta$ <i>rseA</i>                                                                                                                                   | Huang et al. 2014 |
| KJ $\Delta$ RpoE $\Delta$ RseA | <i>S. maltophilia</i> KJ mutant of <i>rseA</i> and <i>rpoE</i> ; $\Delta$ <i>rseA</i> , $\Delta$ <i>rpoE</i>                                                                                            | Huang et al. 2014 |
| V53                            | A clinical quinolone-resistant isolate                                                                                                                                                                  | This study        |
| V53 $\Delta$ DEF               | <i>S. maltophilia</i> V53 mutant of <i>smeDEF</i> operon; $\Delta$ <i>smeDEF</i>                                                                                                                        | This study        |
| V63                            | A clinical quinolone-resistant isolate                                                                                                                                                                  | This study        |
| V63 $\Delta$ DEF               | <i>S. maltophilia</i> V63 mutant of <i>smeDEF</i> operon; $\Delta$ <i>smeDEF</i>                                                                                                                        | This study        |
| V82                            | A clinical quinolone-resistant isolate                                                                                                                                                                  | This study        |
| V82 $\Delta$ DEF               | <i>S. maltophilia</i> V82 mutant of <i>smeDEF</i> operon; $\Delta$ <i>smeDEF</i>                                                                                                                        | This study        |
| V99                            | A clinical quinolone-resistant isolate                                                                                                                                                                  | This study        |
| V99 $\Delta$ 5                 | <i>S. maltophilia</i> V99 mutant of <i>smeUIVWU2X</i> operon; $\Delta$ <i>smeUIVWU2X</i>                                                                                                                | This study        |
| V47                            | A clinical quinolone-resistant isolate                                                                                                                                                                  | This study        |
| V47 $\Delta$ DEF               | <i>S. maltophilia</i> V47 mutant of <i>smeDEF</i> operon; $\Delta$ <i>smeDEF</i>                                                                                                                        | This study        |
| V47 $\Delta$ 5                 | <i>S. maltophilia</i> V47 mutant of <i>smeUIVWU2X</i> operon; $\Delta$ <i>smeUIVWU2X</i>                                                                                                                | This study        |
| V47 $\Delta$ DEF $\Delta$ 5    | <i>S. maltophilia</i> V47 mutant of <i>smeDEF</i> and <i>smeUIVWU2X</i> operons; $\Delta$ <i>smeDEF</i> , $\Delta$ <i>smeUIVWU2X</i>                                                                    | This study        |
| V47 $\Delta$ Smqnr             | <i>S. maltophilia</i> V47 mutant of <i>Smqnr</i> ; $\Delta$ <i>Smqnr</i>                                                                                                                                | This study        |
| V47 $\Delta$ RpoE              | <i>S. maltophilia</i> V47 mutant of <i>rpoE</i> ; $\Delta$ <i>rpoE</i>                                                                                                                                  | This study        |
| V84                            | A clinical quinolone-resistant isolate                                                                                                                                                                  | This study        |
| V84 $\Delta$ RpoE              | <i>S. maltophilia</i> V84 mutant of <i>rpoE</i> ; $\Delta$ <i>rpoE</i>                                                                                                                                  | This study        |
| V61                            | A clinical quinolone-resistant isolate                                                                                                                                                                  | This study        |
| V61 $\Delta$ RpoE              | <i>S. maltophilia</i> V61 mutant of <i>rpoE</i> ; $\Delta$ <i>rpoE</i>                                                                                                                                  | This study        |
| <b><i>E. coli</i></b>          |                                                                                                                                                                                                         |                   |
| DH5a                           | F- $\phi$ 80d/ <i>acZAM15</i> $\Delta$ ( <i>lacZYA-argF</i> ) <i>U169 deoR recA1 endA1 hsdR17</i> ( <i>r<sub>k</sub><sup>-</sup> m<sub>k</sub><sup>+</sup></i> ) <i>phoA supE44<math>\lambda</math></i> | Invitrogen        |

|                 |                                                                                  |                   |
|-----------------|----------------------------------------------------------------------------------|-------------------|
| S17-1           | <i>thi-1 gyrA96 relA1</i><br>λ pir <sup>+</sup> mating strain                    | Simon et al. 1986 |
| <b>Plasmids</b> |                                                                                  |                   |
| pEX18Tc         | <i>sacB oriT</i> , Tc <sup>r</sup>                                               | Hoang et al. 1998 |
| pRK415          | Mobilizable broad-host-range plasmid cloning vector, RK2 origin; Tc <sup>r</sup> | Keen et al. 1988  |
| pΔDEF           | pEX18Tc with an internal-deletion <i>smeDEF</i> operon; Tc <sup>r</sup>          | Huang et al. 2017 |
| pΔ5             | pEX18Tc with an internal-deletion <i>smeUIVWU2X</i> operon; Tc <sup>r</sup>      | Chen et al. 2011  |
| pΔQnr           | pEX18Tc with an internal-deletion <i>smqnr</i> gene; Tc <sup>r</sup>             | Chang et al. 2011 |
| pΔRpoE          | pEX18Tc with an internal-deletion <i>rpoE</i> gene; Tc <sup>r</sup>              | Huang et al. 2014 |
| pΔRseA          | pEX18Tc with an internal-deletion <i>rseA</i> gene; Tc <sup>r</sup>              | Huang et al. 2014 |
| pRpoH           | pRK415 with an intact <i>rpoH</i> gene; Tc <sup>r</sup>                          | This study        |
| pSmqnrC         | pRK415 with an intact <i>SmqnrR-Smqnr</i> cluster; Tc <sup>r</sup>               | This study        |

- Chang, Y. C., Tsai, M. J., Huang, Y. W., Chung, T. C., and Yang, T. C. (2011). SmeQnrR, a DeoR-type transcriptional regulator, negatively regulates the expression of *Smqnr* and *SmtcrA* in *Stenotrophomonas maltophilia*. *J. Antimicrob. Chemother.* 66, 1024-1028.
- Chen, C. H., Huang, C. C., Chung, T. C., Hu, R. M., Huang, Y. W., and Yang, T. C. (2011). Contribution of resistance-nodulation-division efflux pump operon *smeUI-V-W-U2-X* to multidrug resistance of *Stenotrophomonas maltophilia*. *Antimicrob. Agents Chemother.* 55, 5826-5833.
- Hoang, T. T., Karkhoff-Schweizer, R. R., Kutchma, A. J., and Schweizer, H. P. (1998). A broad-host-range FLP-FRT recombination system for site-specific excision of chromosomally-located DNA sequences: application for isolation of unmarked *Pseudomonas aeruginosa* mutants. *Gene.* 212, 77-86.
- Hu, R. M., Huang, K. J., Wu L. T., Hsiao, Y. J., and Yang, T. C. (2008). Inductin of L1 and L2 β-lactamases of *Stenotrophomonas maltophilia*. *Antimicrob. Agents Chemother.* 52, 1198-1200.
- Huang, Y. W., Lin, C. W., Ning, H. C., Lin, Y. T., Chang, Y. C., and Yang, T. C. (2017). Overexpression of SmeDEF efflux pump decrease aminoglycoside resistance in *Stenotrophomonas maltophilia*. *Antimicrob. Agents Chemother.* 61, e02685-16.
- Huang, Y. W., Liou, R. S., Lin, Y. T., Huang, H. H., and Yang, T. C. (2014). A linkage between

SmeIJK efflux pump, cell envelope integrity, and  $\sigma^E$ -mediated envelope stress response in *Stenotrophomonas maltophilia*. *PLoS One* 9, e111784.

Keen, N. T., Tamaki, S., Kobayashi, D., and Trollinger, D. (1988). Improved broad-host-range plasmids for DNA cloning in gram-negative bacteria. *Gene*. 70, 191-197.

Simon, R., O'Connell, M., Labes, M., and Puhler, A. (1986). Plasmid vectors for the genetic analysis and manipulation of rhizobia and other gram-negative bacteria. *Methods Enzymol.* 118, 640-659.
