# Supplementary material for: Substantial Contribution of SmeDEF, SmeVWX, SmQnr, and Heat Shock Response to Fluoroquinolone Resistance in Clinical Isolates of Stenotrophomonas maltophilia
Source: PubMed Central journal article supplement (PMC6479208; doi:10.3389/fmicb.2019.00822), 2019-04-17
Supplement: Table_2.pdf [file Table_2.pdf]

**Table S2 PCR primers used in this study**

| Primer   | Sequences                      | Amplicon (bp) | Reference        |
|----------|--------------------------------|---------------|------------------|
| SmqnrC-F | 5'-GCAAGCTTCTGGCCACCATAA-3'    | 2186          | This study       |
| SmqnrC-R | 5'-GCTCTAGAACCCTGCACTTC-3'     |               | This study       |
| RpoH-F   | 5'- GTTCAAGCTTTGGGGTGCCTA 3'   | 1610          | This study       |
| RpoH-R   | 5'- CACGAGCTCCTATCGGTCAGTGA-3' |               | This study       |
| SmeEQ-F  | 5'- GCAGCTCAACGCCACCATCAAC -3' | 250           | Chen et al. 2011 |
| SmeEQ-R  | 5'- TTCCAGCGCGGCATTACACAC -3'  |               | Chen et al. 2011 |
| SmeWQ-F  | 5'- GCCCACACCATCTCGTTCCC -3'   | 221           | Chen et al. 2011 |
| SmeWQ-R  | 5'- TAGCCGTTGCCGTTGCC -3'      |               | Chen et al. 2011 |
| SmqnrQ-F | 5'- TTCTACGATGCCGACAGCC -3'    | 279           | This study       |
| SmqnrQ-R | 5'- CCACAGCTCGACTTTTCC-3'      |               | This study       |
| RpoEQ-F  | 5'- CGCCGACCGATGACATCGAC -3'   | 254           | Chen et al. 2011 |
| RpoEQ-R  | 5'- CGCCCGGAAGATCCGTGAAC -3'   |               | Chen et al. 2011 |
| RpoHQ-F  | 5'- GCCGACCGACGAGGACAAC 3'     | 263           | This study       |
| RpoHQ-R  | 5'- CCTCAACCTGGCGGATGCG -3'    |               | This study       |
| rDNA-F   | 5'- GACCTTGCGCGATTGAATG-3'     | 75            | Chen et al. 2011 |
| rDNA-R   | 5'- CGGATCGTCGCCTTGGT-3'       |               | Chen et al. 2011 |

Chen, C. H., Huang, C. C., Chung, T. C., Hu, R. M., Huang, Y. W., and Yang, T. C. (2011). Contribution of resistance-nodulation-division efflux pump operon *smeU1-V-W-U2-X* to multidrug resistance of *Stenotrophomonas maltophilia*. *Antimicrob. Agents Chemother.* 55, 5826-5833.
